# Supplementary material for: Natural Killer Cell IFNγ Secretion is Profoundly Suppressed Following Colorectal Cancer Surgery
Source: Springer Nature journal article supplement (doi:10.1245/s10434-018-6691-3), 2018-09-05
Supplement: MOESM1 [file 16100104]

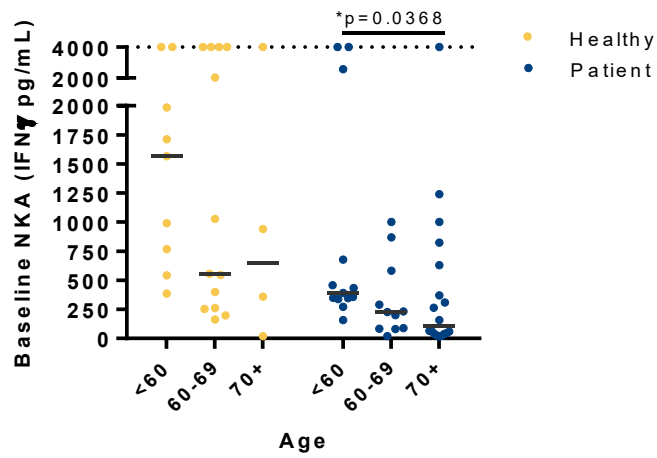

**Supplemental Figure 1. The effect of age upon NK cell IFN $\gamma$  secretion (NKA).** NKA in healthy donors and CRC patients at baseline; Kruskal-Wallis tests. Median indicated by solid line
