# Supplementary material for: Natural Killer Cell IFNγ Secretion is Profoundly Suppressed Following Colorectal Cancer Surgery
Source: Springer Nature journal article supplement (doi:10.1245/s10434-018-6691-3), 2018-09-05
Supplement: MOESM2 [file 16100104]

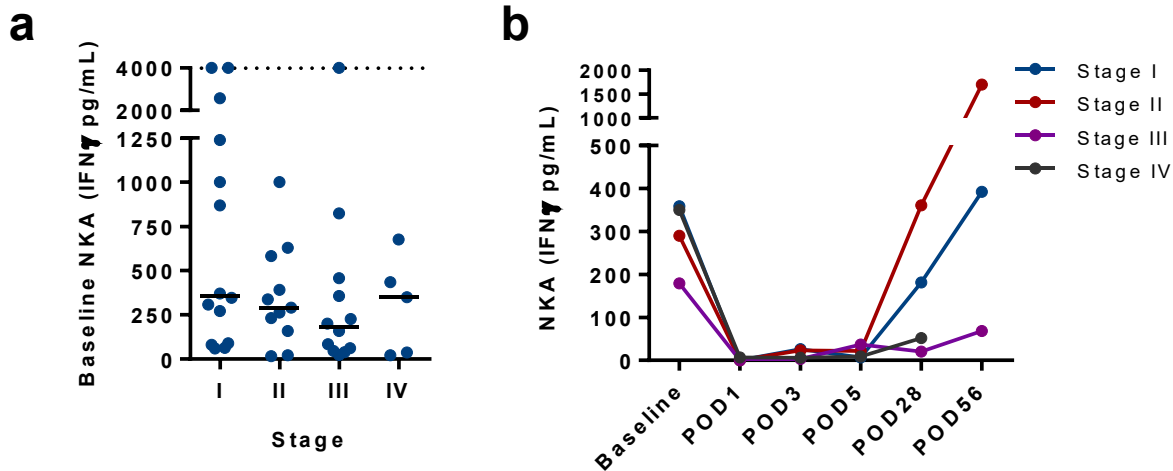

**Supplemental Figure 2. The effect of cancer stage upon NK cell IFN $\gamma$  secretion (NKA). (a) NKA at baseline; Kruskal-Wallis tests. Median indicated by solid line. (b) Median NKA of patients categorized by Stage at Baseline, POD1, 3, 5, 28, and 56.**
