# Supplementary material for: Natural Killer Cell IFNγ Secretion is Profoundly Suppressed Following Colorectal Cancer Surgery
Source: Springer Nature journal article supplement (doi:10.1245/s10434-018-6691-3), 2018-09-05
Supplement: MOESM3 [file 16100104]

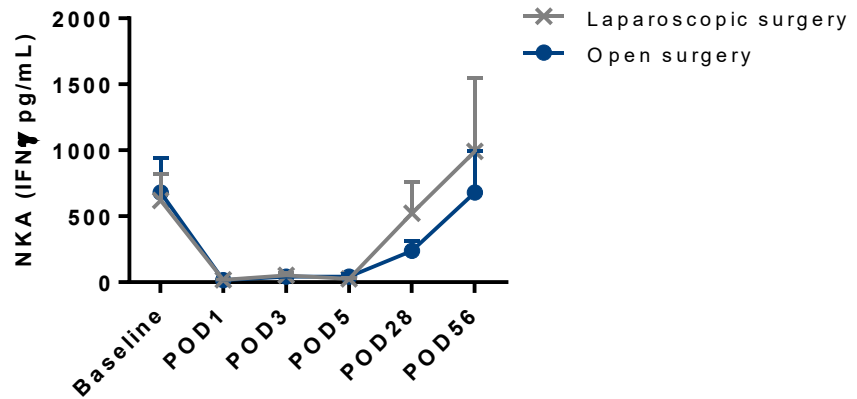

**Supplemental Figure 3. Comparison of NK cell IFN $\gamma$  secretion (NKA) between patients undergoing open (n=20) vs laparoscopic (n=22) surgery.** NKA of patients did not differ significantly between groups at Baseline (p=0.857), POD1 (p=0.54), POD3 (p=0.495), POD5 (p>0.99), POD28 (p=0.674), and POD56 (p=0.71) using multiple Mann-Whitney U tests. On POD28, 7/14 patients in the laparoscopic group and 12/15 patients in the open group remained suppressed. On POD56, 2/7 patients in the laparoscopic group and 2/5 patients in the open group remained suppressed. Mean and SEM (error bars) indicated.
