# Supplementary material for: Natural Killer Cell IFNγ Secretion is Profoundly Suppressed Following Colorectal Cancer Surgery
Source: Springer Nature journal article supplement (doi:10.1245/s10434-018-6691-3), 2018-09-05
Supplement: MOESM4 [file 16100104]

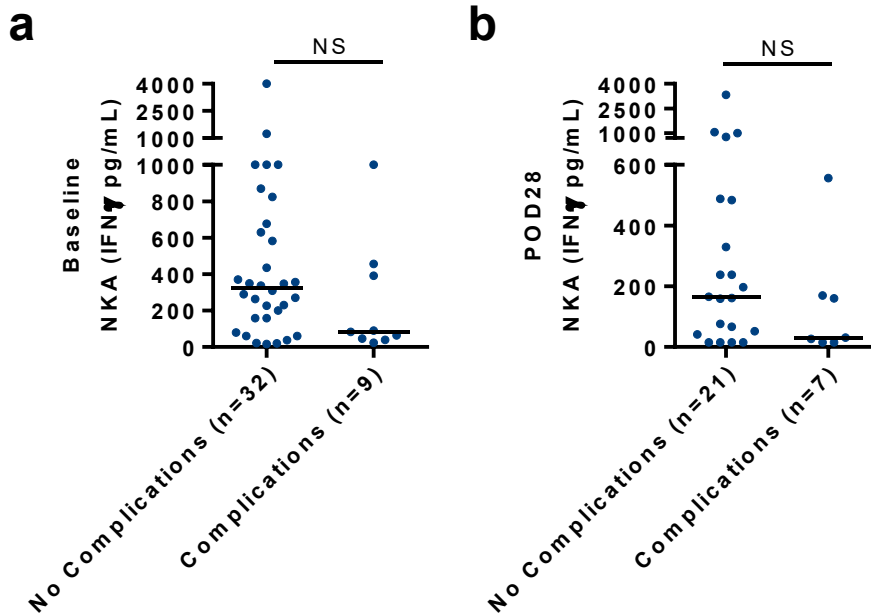

**Supplemental Figure 4. Baseline and POD28 NK cell IFN $\gamma$  secretion (NKA) of patients grouped by development of a post-operative complications.** Patients who develop a post-operative complication (n=9) had a slightly lower NKA as compared to those patients who did not develop a post-operative complication at baseline (323pg/mL vs 84pg/mL; p=0.2) and when measured at POD28 (165pg/mL vs 31pg/mL; p=0.2), but the difference did not reach statistical significance. Mann Whitney U test. Median indicated by solid line.
