# Supplementary material for: Natural Killer Cell IFNγ Secretion is Profoundly Suppressed Following Colorectal Cancer Surgery
Source: Springer Nature journal article supplement (doi:10.1245/s10434-018-6691-3), 2018-09-05
Supplement: MOESM5 [file 16100104]

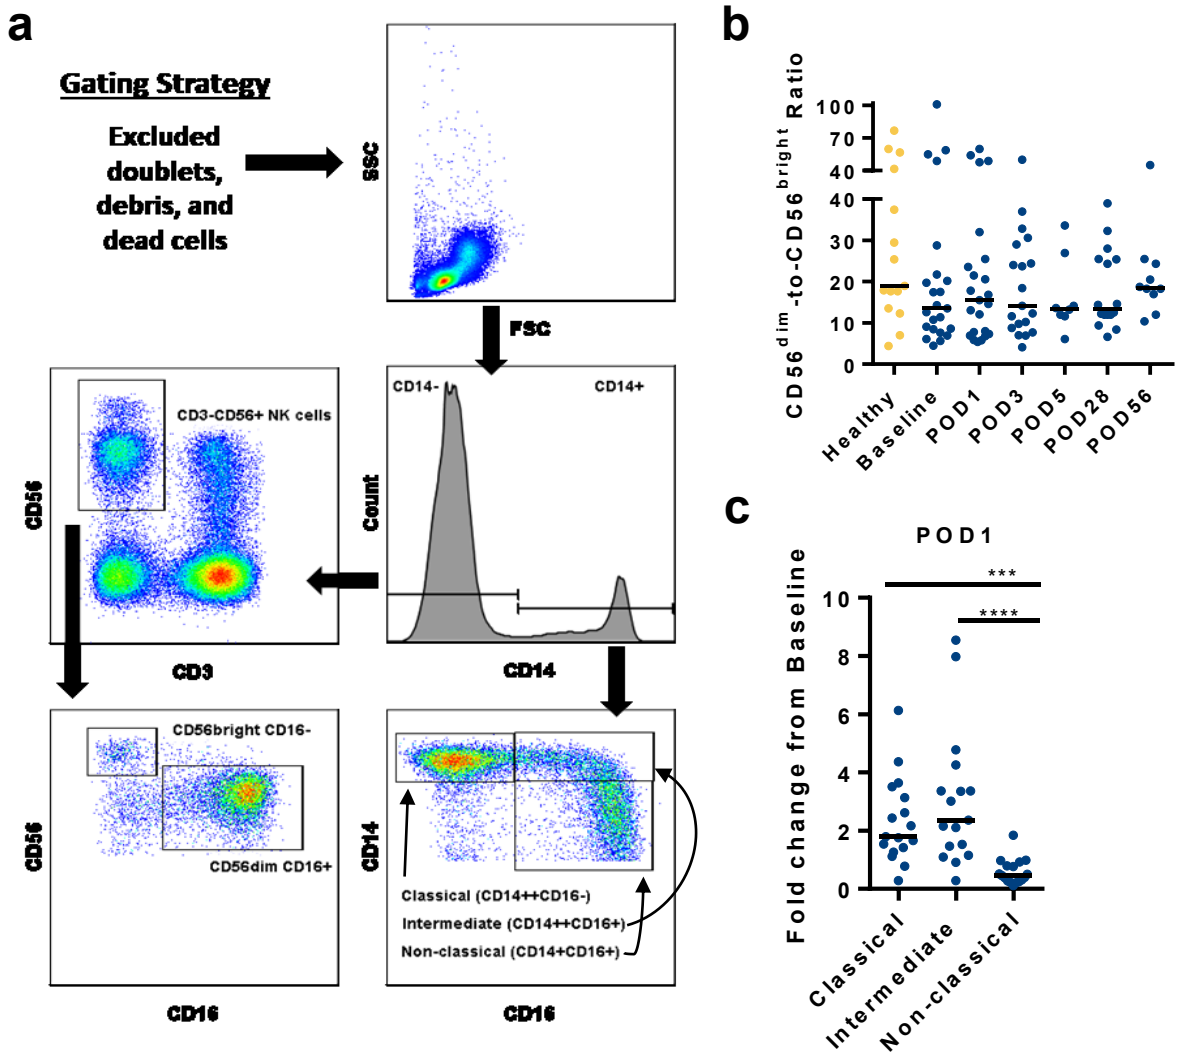

**Supplemental Figure 5. Immune cell profiling.** (a) A representative gating strategy for identifying NK cells ( $CD3^-CD56^+$ ),  $CD56^{bright}$  ( $CD56^{bright} CD16^-$ ),  $CD56^{dim}$  ( $CD56^{dim} CD16^+$ ), and monocyte ( $CD14^+$ ) subpopulations (classical, intermediate, and non-classical). (b) Ratio of  $CD56^{dim}$ -to- $CD56^{bright}$  NK cells in healthy donors and in CRC patients at indicated timepoint. (c) The fold change of classical ( $CD14^{++}CD16^-$ ), intermediate ( $CD14^{++}CD16^+$ ), and non-classical ( $CD14^+CD16^+$ ) monocytes on POD1 compared to baseline. Kruskal-Wallis tests (\*\* $p=0.0002$ , \*\*\*\* $p<0.0001$ ).
